# Supplementary material
Source: PubMed Central journal article supplement (PMC2708004)

## Online data supplement

### Activation of Sphingosine Kinase-1 Reverses the Increase in Lung Vascular Permeability through Sphingosine-1-Phosphate Receptor (S1P1) Signaling in Endothelial Cells

Mohammad Tauseef<sup>1\*</sup>, Vidisha Kini<sup>1\*</sup>, Nebojsa Knezevic<sup>1</sup>, Melissa Brannan<sup>1</sup>, Ram Ramchandaran<sup>1</sup>, Henrik Fyrst<sup>2</sup>, Julie Saba<sup>2</sup>, Stephen M. Vogel<sup>1</sup>, Asrar B. Malik<sup>1</sup> and Dolly Mehta<sup>1</sup>

<sup>1</sup>Department of Pharmacology and Center for Lung and Vascular Biology, College of Medicine, University of Illinois, Chicago, Illinois; and <sup>2</sup>Children's Hospital Oakland Research Institute, Cancer Centre, Oakland, California

Running title: Sphingosine kinase-1 activation prevents vascular leak

\*, equally contributed to the work

**Subject Codes:** [95] Endothelium, [176] Thrombin, [138] Cell signaling/signal transduction, [18] Pulmonary circulation and disease

**Key words:** Sphingosine kinase, lung vascular permeability, thrombin, PAR-1, RhoGTPase, S1P1, S1P

#### **Corresponding Author:**

Dolly Mehta, Ph.D  
Department of Pharmacology,  
The University of Illinois,  
College of Medicine,  
835 S Wolcott Avenue,  
Chicago, IL 60612.  
Tel.: (312) 355-0236, Fax.: (312) 996-1225  
E mail: [dmehta@uic.edu](mailto:dmehta@uic.edu)

## Expanded Methods

**Animals:** The generation and characteristics of the SPHK1-null mice are described elsewhere<sup>1</sup>.

All animal studies were approved by the Institutional Animal Care and Use Committee of University of Illinois. *Sphk1*<sup>-/-</sup> male mice and corresponding wild type cohorts (8-10 wks old) used in all experiments were of C57Blk/6J background. All experiments involving animals were approved by the University of Illinois at Chicago Animal Care and Use Committee.

**Endothelial cell culture:** Human pulmonary arterial endothelial (HPAE) cells were cultured in a T-75 flask coated with 0.1% gelatin in EBM-2 medium supplemented with 10% fetal bovine serum and maintained at 37°C in a humidified atmosphere of 5% CO<sub>2</sub> and 95% air until they formed a confluent monolayer as described<sup>2</sup>.

**Cell transfection:** SPHK1 siRNA 5' GAGCUGCAAGGCCUUGCCC 3' or control siRNA sequences were transduced into cells as described<sup>2</sup>. Briefly, HPAE cells grown to 70% confluence were trypsinized and mixed with 2.4 µg of siRNA along with 100 µl of HCAEC nucleofactor solution. Cells were rapidly electroporated with an Amaxa nucleofactor device in accordance with the manufacturer's recommended program (S-05), mixed in EBM-2 and plated on 60-mm dishes or coverslips for indicated experiments. HPAE cells plated onto gold electrodes, transwell or 12-mm coverslips were transfected with the indicated siRNA using SantaCruz transfection reagent in accordance with the manufacturer's protocol. The cells were used after 72 h of transfection, when there was clear evidence of the expression of protein.

**RT-PCR:** Total RNA was isolated from mouse lungs or HPAE cells using TRIzol<sup>®</sup> reagent (Invitrogen Inc, Carlsbad, CA) according to the manufacturer's instructions. RNA was quantified spectrophotometrically and reverse transcribed using primers to determine the expression of SPHK and S1P receptor. For analyzing the expression of SPHK isoforms in

mouse lung following mRNA primers sequences were used SPHK1 forward:

GGCAGTCATGTCCGGTGATG, reverse: ACAGCAGTGTGCAGTTGATGA and SPHK2

forward: ACAGAACCATGCCCCGTGAG, reverse: AGGTCAACACCGACAACCTG.

Conditions for PCR reaction were: an initial 94°C denaturing for 1 min, followed by 31 cycles of 94°C for 15s each, annealing at 53°C for 30s and termination at 72°C for 45s. The last cycle was followed by a 5min reaction at 72°C. The PCR products were electrophoretically separated on a 2% agarose gel<sup>3</sup>. S1P receptor expression in mouse lungs was determined using following primer sequences. S1P1 forward: GTCCGGCATTACAACCTACAC, reverse:

ATGAGGGAGATGACCCAGCA; S1P2 forward: ACCGAGCACAGCCAACAGTC, reverse:

GCCAGGTTGCCAAGGAACAG; S1P3 forward: GCTGGCCGGCATAGCATA, reverse:

GGATAAAAAGTGGGGACC; S1P4 forward: CCAATGGGCAGAAGTCTCCA, reverse

CTAGGTGCTGCGGACGCT; S1P5 forward: GGAGTAGTTCCCGAAGGACC, reverse,

TCTAGAATCCACGGGGTCTG. S1P receptor expression in HPAE cells was determined using

following primer sequences. S1P1 forward:GACTCTGCTGGCAAATTCAAGCGAC,

reverse:ACCCTTCCCAGTGCATTGTTTCACAG;

S1P2 forward:CTCTCTACGCCAAGCATTATGTGCT, reverse:

TCAGACCACCGTGTTGCCCTC; S1P3 forward: CAAAATGAGGCCTTACGACGCCA,

reverse: TCCCATTCTGAAGTGCTGCGTTC; S1P4 forward: AGCCTTCTGCCCTCTACTC,

reverse:GTAGATGATGGGGTTGACCG; S1P5 forward: GGAGTAGTTCCCGAAGGACC,

reverse: TCTAGAATCCACGGGGTCTG. PCR conditions were initial denaturation step at

94°C for 5 min, followed by 35 cycles consisting in 30 sec at 94°C, 45 sec at 52-62°C, 72°C for

1 min. After a final extension at 72°C for 10 min, PCR products were separated on 2% agarose

gel<sup>4</sup>.

**Endothelial permeability:** Endothelial permeability was determined by determining the influx of Evans blue-labeled albumin across endothelial monolayer as described <sup>5</sup>. Briefly, cells seeded on 0.4 $\mu$  transwell filters (Corning Incorporated, NY) were transfected with indicated siRNA. Cells were then incubated in Hanks' balanced salt solution (GIBCO-BRL) containing 0.5% bovine serum albumin (BSA) and 20 mM HEPES buffer on both sides of the monolayer. The luminal compartment buffer was labeled with a final concentration of 0.057% Evans blue dye in a volume of 700  $\mu$ l. The absorbance of free Evans blue in the luminal and abluminal compartments was always <1% of the total absorbance of Evans blue in the buffer. At the beginning of each measurement a luminal compartment sample was diluted 1:100 to determine the initial absorbance of that compartment. Abluminal compartment samples (100  $\mu$ l) were taken every 5 min for up to a period of 60 min. The absorbance of the samples was measured in a SpectraMax Plus microplate spectrophotometer (Molecular Devices, Sunnyvale, CA) at 620 nm. The clearance rate of Evans blue-labeled albumin was determined by least-squares linear regression between 5 and 60 min for the control and experimental groups.

We also determined endothelial permeability by determining transendothelial electrical resistance (TER) in real time as described <sup>6</sup>.

**Confocal staining:** Cells stimulated with thrombin for indicated times were fixed and incubated with indicated antibody and counter stained with Alexa-Donkey anti Goat 488. Cells were viewed with a 63 $\times$  1.2 NA objective and a Zeiss LSM 510 confocal microscope.

**Sphingosine Kinase Activity:** HPAE cells or mouse lungs were homogenized in buffer (containing in mM, 20 Tris (pH 7.4), 20% glycerol, 1 mercaptoethanol, 1 EDTA, 1 sodium orthovanadate, 40  $\beta$ -glycerophosphate, 15 NaF, 1 phenylmethylsulfonyl fluoride, 0.5 4-deoxy pyridoxine and 10  $\mu$ g/ml each of leupeptin, aprotinin, and soybean trypsin inhibitor).

Lysates containing 40 µg of protein were then mixed in a total volume of 190 µl homogenizing buffer plus 10 µl of 1 mmol/l sphingosine and 10 µl of [<sup>32</sup>P]ATP (10 µCi, 20 mmol/l) and incubated for 30 min at 37 °C. Reactions were terminated by addition of 20 µl of 1 N HCl followed by 0.8 ml of chloroform/methanol/HCl (100:200:1, v/v). After vigorous vortexing, 240 µl of chloroform and 240 µl of 2 M KCl were added, organic phases were separated by centrifugation and lipids were resolved by thin layer chromatography in solvent system containing 1-butanol/ethanol/acetic acid/water (80:20:10:20, v/v) and visualized by autoradiography. The radioactive spots corresponding to authentic S1P were identified, scraped from the plates, and counted in a scintillation counter. Sphingosine kinase specific activity was calculated and expressed as pmol of S1P formed per min (unit)/mg of protein<sup>3</sup>.

**S1P Measurements:** HPAE cells were spun down and 200 pmol of C17-S1P as internal standard was added. Cell pellet was dissolved in water and cells were lysed by tip sonicator. A two phase system was obtained by adding CHCl<sub>3</sub>/MeOH/NH<sub>4</sub>OH. The aqueous phase was recovered and acidified by adding 0.5 ml glacial acetic acid. Another two phase separation was obtained by adding one volume of chloroform. Organic phase was recovered and dried down with a flow of nitrogen. Samples were resuspended in methanol and analyzed using LC-mass spectroscopy as described<sup>7</sup>. Lung S1P was extracted as above except that 2 nmol of internal standard C17-S1P was added to homogenates.

**Measurement of GTPase activity:** RhoA and Rac1 activities were measured using GST-rotekin-RBD binding and GST-PAK binding beads respectively as described<sup>6</sup>.

**LPS treatment:** Wild type and *Sphk1*<sup>-/-</sup> mice were exposed to LPS as described previously<sup>8</sup>. Briefly, mice housed in sealed container were exposed to a nebulized solution of lyophilized *E. coli* LPS in sterile saline (1 mg/ml) for 45 min at a driving flow rate (8 l/min) using a small

volume nebulizer (Resigard II; Marquest Medical, Englewood, CO) and sacrificed after indicated time.

**Assessment of Lung Capillary Leakage:** Evans blue dye albumin (EBA) (20 mg/kg) was injected retro-orbitally 30 minutes before the termination of the experiment to assess vascular leak as described<sup>9</sup>. The lungs were perfused free of blood (perfusion pressure of 5 mm Hg) with phosphate-buffered saline (PBS) containing 5 mM ethylenediaminetetraacetic acid via thoracotomy, excised *en bloc*, blotted dry, weighed, and snap frozen in liquid nitrogen. The right lung was homogenized in PBS (1 ml/100  $\mu$ g tissue), incubated with 2 volumes of formamide (18 hours, 60°C), and centrifuged at 5,000  $\times$  g for 30 minutes, and the optical density of the supernatant was determined spectrophotometrically at 620 nm. The extravasated EBA concentration in lung homogenate was calculated against a standard curve (micrograms Evans blue dye per lung).

**Pulmonary microvascular permeability:** *Sphk1*<sup>-/-</sup> and WT mice were anesthetized with an *i.p.* injection of ketamine (100 mg/kg) and xylazine (2.5 g/kg). We measured microvessel permeability in the lung by determining microvascular filtration coefficient ( $K_{f,c}$ ) and isogravimetric lung water determinations as described<sup>6,10</sup>. Briefly, after establishing isogravimetric lungs, outflow pressure was elevated by 10 cm H<sub>2</sub>O for 20 min. The lung wet weight increase over this time, which reflects the net fluid accumulation, was continuously recorded. At the end of each experiment, lung dry weight was determined.  $K_{f,c}$  (ml  $\cdot$  min<sup>-1</sup>  $\cdot$  cm H<sub>2</sub>O  $\cdot$  g dry wt<sup>-1</sup>) was calculated from the slope of the recorded weight change normalized to the pressure change and lung dry weight.

**Drug infusion:** In the isolated murine lung preparations, drugs were infused through a side-port in the perfusion cannula at a rate of 0.2 ml/min such that the total flow through the lung

vasculature remained at 2 ml/min. S1P (final concentration, 1  $\mu\text{mol/l}$ ) was infused 15 min before perfusing PAR-1 agonist peptide (TFLLRN-NH<sub>2</sub>; perfusate concentration. 10  $\mu\text{mol/l}$ ). PAR-1 agonist peptide or control peptide (FTLLRN-NH<sub>2</sub>; 1 mg/kg) and S1P (final concentration 1  $\mu\text{mol/l}$ ) were administered through retroorbital route.

**Lung weight determination:** Left lungs from the same mouse, which we used for Evans blue albumin extravasation, were excised and completely dried in the oven at 60°C overnight for calculation of lung wet-dry- ratio <sup>11</sup>.

**Lung histology:** Formalin fixed tissues were dehydrated in 70% ethanol and four-micrometer-thick sections were stained with hematoxylin-eosin and examined by light microscopy. Infiltration of neutrophils was quantified by determining the number of neutrophils adhered/ mm<sup>2</sup> lung surface area.

**Statistical analysis:** One way ANOVA and post-hoc *t*-test was used to compare data between groups.  $p < 0.05$  was considered statistically significant.

## References

1. Allende ML, Sasaki T, Kawai H, Olivera A, Mi Y, van Echten-Deckert G, Hajdu R, Rosenbach M, Keohane CA, Mandala S, Spiegel S, Proia RL. Mice deficient in sphingosine kinase 1 are rendered lymphopenic by FTY720. *J Biol Chem.* 2004;279:52487-52492.
2. Singh I, Knezevic N, Ahmmmed GU, Kini V, Malik AB, Mehta D. Galphaq-TRPC6-mediated Ca<sup>2+</sup> entry induces RhoA activation and resultant endothelial cell shape change in response to thrombin. *J Biol Chem.* 2007;282:7833-7843.
3. Billich A, Bornancin F, Devay P, Mechtcheriakova, D. Urtz, N. Baumruker, T. Phosphorylation of the immunomodulatory drug FTY720 by sphingosine kinases. *J Biol Chem.* 2003;278:47408-47415.
4. Lee Y-W LJ-J, Kuo Y-T, Huang Y-T, Chen Y-C, Lee H. The expression profiles of lysophospholipid receptors (LPLRs) in different endothelial cells. *Taiwania.* 2006;51:11-24.
5. Patterson CE, Rhoades RA, Garcia JG. Evans blue dye as a marker of albumin clearance in cultured endothelial monolayer and isolated lung. *J Appl Physiol.* 1992;72:865-873.
6. Holinstat M, Knezevic N, Broman M, Samarel AM, Malik AB, Mehta D. Suppression of RhoA activity by focal adhesion kinase-induced activation of p190RhoGAP: role in regulation of endothelial permeability. *J Biol Chem.* 2006;281:2296-2305.
7. Bandhuvula P, Tam YY, Oskouian B, Saba JD. The immune modulator FTY720 inhibits sphingosine-1-phosphate lyase activity. *J Biol Chem.* 2005;280:33697-33700.
8. Koay MA, Christman JW, Wudel LJ, Allos T, Cheng DS, Chapman W C, Blackwell TS. Modulation of endotoxin-induced NF-kappa B activation in lung and liver through TNF type 1 and IL-1 receptors. *Am J Physiol Lung Cell Mol Physiol.* 2002;283:L1247-1254.
9. Peng X, Hassoun PM, Sammani S, McVerry BJ, Burne MJ, Rabb H, Pearse D, Tudor RM, Garcia JG. Protective effects of sphingosine 1-phosphate in murine endotoxin-induced inflammatory lung injury. *Am J Respir Crit Care Med.* 2004;169:1245-1251.
10. Vogel SM, Gao X, Mehta D, Ye RD, John TA, Andrade-Gordon P, Tirupathi C, Malik AB. Abrogation of thrombin-induced increase in pulmonary microvascular permeability in PAR-1 knockout mice. *Physiol Genomics.* 2000;4:137-145.
11. Barnard JW, Biro MG, Lo SK, Ohno S, Carozza MA, Moyle M, Soule HR, Malik AB. Neutrophil inhibitory factor prevents neutrophil-dependent lung injury. *J Immunol.* 1995;155:4876-4881.



## **Online Figure Legend**

### **Online Figure I: Expression of S1P receptor isoforms in mouse lungs and human endothelial cells.**

RT-PCR of S1P receptor expression in WT mouse lungs (A) and HPAE cells (B). RNA extracted from lungs or cells was treated with DNAase and reverse-transcribed using suitable primers as described in Methods. GAPDH was used as internal control.

Online Figure I

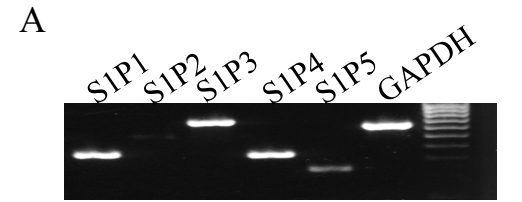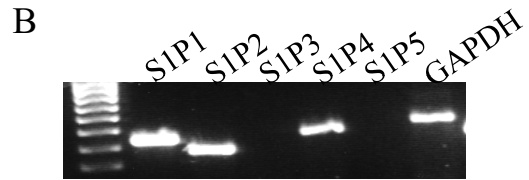

Supplement: NIHMS91529-supplement-01.pdf [file NIHMS91529-supplement-01.pdf]
